# Supplementary material
Source: HighWire-hosted journal article supplement (https://erj.ersjournals.com/content/53/3/1801371)
Supplement: inline-supplementary-material-2 [file inline-supplementary-material-2.pdf]

| Gene   | Mutation Category | Nucleotide change                                | Amino Acid change | Clinically defined disease | References |
|--------|-------------------|--------------------------------------------------|-------------------|----------------------------|------------|
| BMPR2  | Nonsense          | c.39G>A                                          | p.Trp13*          | sporadic PAH               | [1]        |
| BMPR2  | Nonsense          | c.244C>T                                         | p.Gln82*          | sporadic PAH               | [2]        |
| BMPR2  | Splice-site       | c.248-2A>G                                       | p. ?              | sporadic PAH               | [3]        |
| BMPR2  | Frameshift        | c.350dupG                                        | p.Cys117Trpfs*3   | sporadic PAH               | This study |
| BMPR2  | Missense          | c.367T>A                                         | p.Cys123Ser       | sporadic PAH               | [3]        |
| BMPR2  | Splice-site       | c.418+1del                                       | p. ?              | sporadic PAH               | This study |
| BMPR2  | Nonsense          | c.439C>T                                         | p.Arg147*         | fPAH, sporadic PAH         | [3]        |
| BMPR2  | Nonsense          | c.491del                                         | p.Leu164*         | sporadic PAH               | This study |
| BMPR2  | Nonsense          | c.631C>T                                         | p.Arg211*         | sporadic PAH               | [3]        |
| BMPR2  | Nonsense          | c.961C>T                                         | p.Arg321*         | sporadic PAH               | [3]        |
| BMPR2  | Splice-site       | c.968-12T>G                                      | p.Asp323Valfs*15  | sporadic PAH               | This study |
| BMPR2  | Nonsense          | c.994C>T                                         | p.Arg332*         | fPAH                       | [3]        |
| BMPR2  | Missense          | c.1118C>T                                        | p.Ala373Val       | sporadic PAH               | This study |
| BMPR2  | Missense          | c.1471C>T                                        | p.Arg491Trp       | 4 sporadic PAH ,<br>fPAH,  | [3]        |
| BMPR2  | Nonsense          | c.1483C>T                                        | p.Gln495*         | sporadic PAH               | [3]        |
| BMPR2  | Nonsense          | c.2359G>T                                        | p.Gly787*         | sporadic PAH               | This study |
| BMPR2  | Nonsense          | c.2617C>T                                        | p.Arg873*         | fPAH                       | [3]        |
| BMPR2  | Nonsense          | c.2695C>T                                        | p.Arg899*         | fPAH, sporadic PAH         | [3]        |
| BMPR2  | Deletion          | c.(?-<br>1148)_(76+1<br>_77-1)del                | p.?               | 2 sporadic PAH             | [3]        |
| BMPR2  | Deletion          | c.(?-<br>1148)_(1276<br>+1_1277-<br>1)del        | p.?               | sporadic PAH               | This study |
| BMPR2  | Deletion          | c.(1276+1_12<br>77-<br>1)_(1413+1_<br>1414-1)del | p. ?              | sporadic PAH               | [3]        |
| BMPR2  | Deletion          | c.(76+1_77-<br>1)_(247+1_2<br>48-1)del           | p.?               | sporadic PAH               | [3]        |
| BMPR2  | Deletion          | c.(76+1_77-<br>1)_(418+1_4<br>19-1)del           | p.?               | fPAH                       | [3]        |
| BMPR2  | Deletion          | c.(1276+1_12<br>77-<br>1)_(1413+1_<br>1414-1)    | p. ?              | sporadic PAH               | [3]        |
| ACVRL1 | Missense          | c.1120C>T                                        | p.Arg374Trp       | sporadic PAH               | [4]        |
| ACVRL1 | Missense          | c.1450C>T                                        | p.Arg484Trp       | sporadic PAH               | [5]        |
| TBX4   | Nonsense          | c.121G>T                                         | p.Gly41*          | sporadic PAH               | This study |
| TBX4   | Frameshift        | c.143dup                                         | p.Pro50Thrfs*24   | sporadic PAH               | This study |
| TBX4   | Frameshift        | c.153_181del                                     | p.Val54Hisfs*10   | sporadic PAH               | This study |
| TBX4   | Frameshift        | c.1458dup                                        | p.Pro487Alafs*16  | sporadic PAH               | This study |
| TBX4   | Deletion          | c.(549+1_550<br>-<br>1)_(702+1_7<br>03-1)        | p. ?              | sporadic PAH               | This study |
| BMP9   | Nonsense          | c.451C>T                                         | p.Arg151*         | sporadic PAH               | This study |

|         |            |                               |                   |              |            |
|---------|------------|-------------------------------|-------------------|--------------|------------|
| BMP9    | Frameshift | c.990delinsG<br>T             | p.Ser331Phefs*22  | sporadic PAH | This study |
| SMAD9   | Deletion   | c.(?-<br>186)_(*3846<br>?)del | p.?               | sporadic PAH | This study |
| BMP10   | Nonsense   | c.370C>T                      | p.Arg124*         | sporadic PAH | This study |
| EIF2AK4 | Missense   | c.361G>A<br>compound<br>HTZ   | p.Val121Met       | PVOD         | [6]        |
| EIF2AK4 | Nonsense   | c.951G>A                      | p.Trp317*         | PVOD         | This study |
| EIF2AK4 | Nonsense   | c.1387C>T                     | p.Arg463*         | PVOD         | [7]        |
| EIF2AK4 | Missense   | c.1754G>A<br>HMZ              | p.Arg585Gln       | PVOD         | [7]        |
| EIF2AK4 | Frameshift | c.2475_2476<br>del HMZ        | p.Trp826Glufs*15  | PVOD         | This study |
| EIF2AK4 | Missense   | c.2968C>T<br>HMZ              | p.Pro990Ser       | PVOD         | This study |
| EIF2AK4 | Nonsense   | c.3097C>T<br>compound<br>HTZ  | p.Gln1033*        | PVOD         | [8]        |
| EIF2AK4 | Nonsense   | c.3406C>T<br>HMZ              | p.Arg1136*        | PVOD         | [7]        |
| EIF2AK4 | Frameshift | c.4205dup<br>HMZ              | p.Ser1403Lysfs*45 | PVOD         | [7]        |
| EIF2AK4 | Frameshift | c.4593del<br>compound<br>HTZ  | p.Ile1533Leufs*2  | PVOD         | This study |
| EIF2AK4 | Nonsense   | c.4769del<br>compound<br>HTZ  | p.Leu1590*        | PVOD         | [8]        |

Supplementary Table 1. Mutations identified in the cohort.

When the same mutation was identified in more than one patient of the study, the number of patients is mentioned in the column “clinically defined disease”.

#### References of the table.

1. Hamid R, Hedges LK, Austin E, Phillips JA, Loyd JE, Cogan JD. Transcripts from a novel BMPR2 termination mutation escape nonsense mediated decay by downstream translation re-initiation: implications for treating pulmonary hypertension. *Clin. Genet.* 2010; 77: 280–286.
2. Machado RD, Aldred MA, James V, Harrison RE, Patel B, Schwalbe EC, Gruenig E, Janssen B, Koehler R, Seeger W, Eickelberg O, Olschewski H, Elliott CG, Glissmeyer E, Carlquist J, Kim M, Torbicki A, Fijalkowska A, Szewczyk G, Parma J, Abramowicz MJ, Galie N, Morisaki H, Kyotani S, Nakanishi N, Morisaki T, Humbert M, Simonneau G, Sitbon O, Soubrier F, et al. Mutations of the TGF-beta type II receptor BMPR2 in pulmonary arterial hypertension. *Hum Mutat* 2006; 27: 121–132.
3. Machado RD, Southgate L, Eichstaedt CA, Aldred MA, Austin ED, Best DH, Chung WK, Benjamin N, Elliott CG, Eyries M, Fischer C, Gräf S, Hinderhofer K, Humbert M, Keiles SB, Loyd JE, Morrell NW, Newman JH, Soubrier F, Trembath RC, Viales RR, Grünig E. Pulmonary Arterial Hypertension: A Current Perspective on Established and Emerging Molecular Genetic Defects. *Hum. Mutat.* 2015; 36: 1113–1127.

4. Berg JN, Gallione CJ, Stenzel TT, Johnson DW, Allen WP, Schwartz CE, Jackson CE, Porteous ME, Marchuk DA. The activin receptor-like kinase 1 gene: genomic structure and mutations in hereditary hemorrhagic telangiectasia type 2. *Am J Hum Genet* 1997; 61: 60–67.
5. Trembath RC, Thomson JR, Machado RD, Morgan NV, Atkinson C, Winship I, Simonneau G, Galie N, Loyd JE, Humbert M, Nichols WC, Morrell NW, Berg J, Manes A, McGaughan J, Pauciulo M, Wheeler L. Clinical and molecular genetic features of pulmonary hypertension in patients with hereditary hemorrhagic telangiectasia. *N Engl J Med* 2001; 345: 325–34.
6. Montani D, Girerd B, Jaïs X, Levy M, Amar D, Savale L, Dorfmüller P, Seferian A, Lau EM, Eyries M, Le Pavec J, Parent F, Bonnet D, Soubrier F, Fadel E, Sitbon O, Simonneau G, Humbert M. Clinical phenotypes and outcomes of heritable and sporadic pulmonary veno-occlusive disease: a population-based study. *Lancet Respir. Med.* 2017; 5: 125–134.
7. Eyries M, Montani D, Girerd B, Perret C, Leroy A, Lonjou C, Chelghoum N, Coulet F, Bonnet D, Dorfmüller P, Fadel E, Sitbon O, Simonneau G, Tregouet DA, Humbert M, Soubrier F. EIF2AK4 mutations cause pulmonary veno-occlusive disease, a recessive form of pulmonary hypertension. *Nat Genet* 2014; 46: 65–69.
8. Hadinnapola C, Bleda M, Haimel M, Screatton N, Swift A, Dorfmüller P, Preston SD, Southwood M, Hernandez-Sanchez J, Martin J, Treacy C, Yates K, Bogaard H, Church C, Coghlan G, Condliffe R, Corris PA, Gibbs S, Girerd B, Holden S, Humbert M, Kiely DG, Lawrie A, Machado R, MacKenzie Ross R, Moledina S, Montani D, Newnham M, Peacock A, Pepke-Zaba J, et al. Phenotypic Characterization of EIF2AK4 Mutation Carriers in a Large Cohort of Patients Diagnosed Clinically With Pulmonary Arterial Hypertension. *Circulation* 2017; 136: 2022–2033.

|                                              |     |                                                       |                                                        |     |
|----------------------------------------------|-----|-------------------------------------------------------|--------------------------------------------------------|-----|
| BMP10 Homo sapiens                           | 300 | LQMRSNIIYDSTARIRRNAKGNYCKRTPLYIDFKEIGWDSWIIAPPGYEAYEC | <span style="border: 1px solid black;">R</span> GVGNYP | 359 |
| BMP10 Pan troglodytes                        | 300 | LQMRSNIIYDSTARIRRNAKGNYCKRTPLYIDFKEIGWDSWIIAPPGYEAYEC | RGVGNYP                                                | 359 |
| BMP10 Felis catus                            | 300 | LQMRSNIIYDSTARIRRNAKGNYCKRTPLYIDFKEIGWDSWIIAPPGYEAYEC | RGVGNYP                                                | 359 |
| BMP10 Ictidomys tridecemlineatus             | 298 | LQMRSNIIYDSTARIRRNAKGNYCKRTPLYIDFKEIGWDSWIIAPPGYEAYEC | RGVGNYP                                                | 357 |
| BMP10 Equus caballus                         | 300 | LQMRSNIIYDSTARIRRNAKGNYCKRTPLYIDFKEIGWDSWIIAPPGYEAYEC | RGVGNYP                                                | 359 |
| BMP10 Camelus ferus                          | 300 | LQMRSNIIYDSTARIRRNAKGNYCKRTPLYIDFKEIGWDSWIIAPPGYEAYEC | RGVGNYP                                                | 359 |
| BMP10 Canis lupus familiaris                 | 300 | LQMRSNIIYDSTARIRRNAKGNYCKRTPLYIDFKEIGWDSWIIAPPGYEAYEC | RGVGNYP                                                | 359 |
| BMP10 Cavia porcellus                        | 300 | LQMRSNIIYDSTARIRRNAKGNYCKRTPLYIDFKEIGWDSWIIAPTGYEAYEC | RGVGNYP                                                | 359 |
| BMP10 Rattus norvegicus                      | 297 | LQMRSNMIDDSTARIRRNAKGNYCKKTPLYIDFKEIGWDSWIIAPPGYEAYEC | RGVGNYP                                                | 356 |
| BMP10 Mus musculus                           | 297 | LQMRSNMIDDSSARIRRNAKGNYCKKTPLYIDFKEIGWDSWIIAPPGYEAYEC | RGVGNYP                                                | 356 |
| BMP10 Xenopus laevis                         | 297 | LQMRSNIIYDASSRIRRNAKGNYCKKTPLYIDFSEIGWNSWIIAPQGYEAYEC | RGVCSYP                                                | 356 |
| *****:* *:.:*****:*****.****:***** *******.* |     |                                                       |                                                        |     |

Supplementary table 2. Alignment of BMP10 sequences in mammalian species and xenopus laevis. The human Arginine residue 353 mutated into Cysteine in one patient is conserved in all species tested and is boxed.
